# Supplementary material
Source: Springer Nature journal article supplement (http://www.springermedizin.de/resource/supplementary/12894_2004_29_MOESM1_ESM.csv/9513796)
Supplement: MOESM1 [file 9513796]

Case,Initial pre-treatment PSA value,Month of initial pre-treatment PSA,Year of initial pre-treatment PSA,Post-treatment PSA value #1,Month of post-treatment PSA #1,Year of post-treatment PSA #1,Post-treatment PSA value #2,Month of post-treatment PSA #2,Year of post-treatment PSA #3,Post-treatment PSA value #3,Month of post-treatment PSA #3,Year of post-treatment PSA #3,Post-treatment PSA value #4,Month of post-treatment PSA #4,Year of post-treatment PSA #4,Post-treatment PSA value #5,Month of post-treatment PSA #5,Year of post-treatment PSA #5,Post-treatment PSA value #6,Month of post-treatment PSA #6,Year of post-treatment PSA #6,Post-treatment PSA value #7,Month of post-treatment PSA #7,Year of post-treatment PSA #7,Post-treatment PSA value #8,Month of post-treatment PSA #8,Year of post-treatment PSA #8,Post-treatment PSA value #9,Month of post-treatment PSA #9,Year of post-treatment PSA #9,Post-treatment PSA value #10,Month of post-treatment PSA #10,Year of post-treatment PSA #10,Post-treatment PSA value #11,Month of post-treatment PSA #11,Year of post-treatment PSA #11,Post-treatment PSA value #12,Month of post-treatment PSA #12,Year of post-treatment PSA #12,Post-treatment PSA value #13,Month of post-treatment PSA #13,Year of post-treatment PSA #13,Post-treatment PSA value #14,Month of post-treatment PSA #14,Year of post-treatment PSA #14,Post-treatment PSA value #15,Month of post-treatment PSA #15,Year of post-treatment PSA #15,Post-treatment PSA value #16,Month of post-treatment PSA #16,Year of post-treatment PSA #16,Post-treatment PSA value #17,Month of post-treatment PSA #17,Year of post-treatment PSA #17,Post-treatment PSA value #18,Month of post-treatment PSA #18,Year of post-treatment PSA #18,Post-treatment PSA value #19,Month of post-treatment PSA #19,Year of post-treatment PSA #19,Post-treatment PSA value #20,Month of post-treatment PSA #20,Year of post-treatment PSA #20,Post-treatment PSA value #21,Month of post-treatment PSA #21,Year of post-treatment PSA #21,Post-treatment PSA value #22,Month of post-treatment PSA #22,Year of post-treatment PSA #22,Post-treatment PSA value #23,Month of post-treatment PSA #23,Year of post-treatment PSA #23,Post-treatment PSA value #24,Month of post-treatment PSA #24,Year of post-treatment PSA #24,Post-treatment PSA value #25,Month of post-treatment PSA #25,Year of post-treatment PSA #25
1,4.2,7,1997,0,10,1997,0,5,1998,0,3,1999,,,,,,,,,,,,,,,,,,,,,,,,,,,,,,,,,,,,,,,,,,,,,,,,,,,,,,,,,,,,,,,,,,
2,8.4,9,1997,0,11,1997,0,1,1998,0,5,1998,0.4,3,2001,0.5,2,2002,0.6,1,2003,,,,,,,,,,,,,,,,,,,,,,,,,,,,,,,,,,,,,,,,,,,,,,,,,,,,,,,,,
3,5.6,5,1994,0,12,1996,0,7,1997,0,1,1998,0.2,5,1998,0.9,9,1998,,,,,,,,,,,,,,,,,,,,,,,,,,,,,,,,,,,,,,,,,,,,,,,,,,,,,,,,,,,,
4,5.6,9,1996,0,12,1996,0,9,1997,0,9,2000,0,10,2001,,,,,,,,,,,,,,,,,,,,,,,,,,,,,,,,,,,,,,,,,,,,,,,,,,,,,,,,,,,,,,,
5,16.3,12,1996,0,6,1997,0,10,1997,,,,,,,,,,,,,,,,,,,,,,,,,,,,,,,,,,,,,,,,,,,,,,,,,,,,,,,,,,,,,,,,,,,,,
6,5.5,,,0,2,1997,0,10,1999,0.2,3,2001,0.3,6,2001,0.2,5,2002,,,,,,,,,,,,,,,,,,,,,,,,,,,,,,,,,,,,,,,,,,,,,,,,,,,,,,,,,,,,
7,3.9,4,1996,0,6,1996,0,10,1996,0,1,1997,0,4,1997,0,11,1997,0,4,1998,0,11,1998,0,5,1999,0,11,1999,0,7,2000,0,4,2001,0,4,2002,0,4,2003,,,,,,,,,,,,,,,,,,,,,,,,,,,,,,,,,,,,
8,8.1,9,1996,0,12,1996,0,3,1997,0,7,1997,0,1,1998,0,7,1998,0,3,1999,0,9,1999,0,9,2000,0,9,2001,0,10,2002,,,,,,,,,,,,,,,,,,,,,,,,,,,,,,,,,,,,,,,,,,,,,
9,5.8,3,1996,0,5,1996,0,9,1996,0.2,3,1997,0,9,1997,0.2,3,1998,0.1,5,1998,0,12,1999,0,12,2001,0,6,2002,,,,,,,,,,,,,,,,,,,,,,,,,,,,,,,,,,,,,,,,,,,,,,,,
10,4.5,6,1996,0,11,1996,0,8,1997,0,7,2000,0,1,2001,0,8,2002,,,,,,,,,,,,,,,,,,,,,,,,,,,,,,,,,,,,,,,,,,,,,,,,,,,,,,,,,,,,
11,20,9,1996,0.9,3,1997,2,7,1997,0.1,3,1998,1.9,12,2001,,,,,,,,,,,,,,,,,,,,,,,,,,,,,,,,,,,,,,,,,,,,,,,,,,,,,,,,,,,,,,,
12,9.5,8,1996,0,10,1996,,,,,,,,,,,,,,,,,,,,,,,,,,,,,,,,,,,,,,,,,,,,,,,,,,,,,,,,,,,,,,,,,,,,,,,,
13,,,,,,,,,,,,,,,,,,,,,,,,,,,,,,,,,,,,,,,,,,,,,,,,,,,,,,,,,,,,,,,,,,,,,,,,,,,,,,
14,,,,,,,,,,,,,,,,,,,,,,,,,,,,,,,,,,,,,,,,,,,,,,,,,,,,,,,,,,,,,,,,,,,,,,,,,,,,,,
15,,,,0,11,1996,0,2,1997,0,5,1997,0,5,1998,0,11,1998,0,5,1999,0,11,1999,0,1,2001,,,,,,,,,,,,,,,,,,,,,,,,,,,,,,,,,,,,,,,,,,,,,,,,,,,
16,28.4,7,1996,0.8,11,1996,1.1,1,1997,0.2,5,1998,0.269,4,2003,,,,,,,,,,,,,,,,,,,,,,,,,,,,,,,,,,,,,,,,,,,,,,,,,,,
17,,,,0,12,1995,0,10,1996,0,5,1997,0,9,1997,0,3,1998,,,,,,,,,,,,,,,,,,,,,,,,,,,,,,,,,,,,,,,,,,,,,,,,
18,8.1,9,1996,0.9,1,1997,0,5,1997,0,9,1997,0,4,1998,0.3,5,1999,0.3,6,1999,,,,,,,,,,,,,,,,,,,,,,,,,,,,,,,,,,,,,,,,,,,,,
19,6,11,1996,0,1,1997,0.2,3,1997,0,3,1997,0,5,1997,0,9,1997,0,3,1998,,,,,,,,,,,,,,,,,,,,,,,,,,,,,,,,,,,,,,,,,,,,,
20,12,9,1996,0.4,1,1997,0.5,2,1997,0.8,8,1997,1.5,2,1998,,,,,,,,,,,,,,,,,,,,,,,,,,,,,,,,,,,,,,,,,,,,,,,,,,,
21,,,,0,6,1997,0,12,1997,,,,,,,,,,,,,,,,,,,,,,,,,,,,,,,,,,,,,,,,,,,,,,,,,,,,,,,,,
22,7.2,2,1995,0,4,1995,0,3,1996,0,8,1996,0,11,1996,0,5,1997,0,11,1997,0,5,1998,0,11,1998,0,6,1999,0,11,1999,0,6,2000,,,,,,,,,,,,,,,,,,,,,,,,,,,,,,
23,5,9,1995,0.1,11,1995,0.2,3,1996,0.4,9,1996,0.4,1,1997,0.4,4,1997,0.6,12,1997,0.8,3,1998,1,10,1998,1,1,1999,1.3,9,1999,,,,,,,,,,,,,,,,,,,,,,,,,,,,,,,,,
24,10.3,3,1995,0,5,1995,0,8,1995,0,9,1995,0,1,1996,0.1,9,1996,0,12,1996,0,5,1997,0.1,11,1997,0.4,5,1998,0.4,7,1998,0.5,9,1998,0.4,5,1999,0.2,11,1999,0.2,2,2000,0.1,6,2000,0.1,11,2000,0.2,5,2001,0.6,5,2002,0.8,10,2002,1.1,1,2003,0.9,1,2003
25,4.9,3,1995,0,4,1995,0,8,1996,0,2,1997,0,9,1997,0,3,1998,,,,,,,,,,,,,,,,,,,,,,,,,,,,,,,,,,,,,,,,,,,,,,,,
26,9.6,3,1994,0,5,1994,0,10,1994,0,9,1995,0.2,8,1996,0.2,9,1996,0.3,4,1997,0,5,1997,1.7,3,2000,,,,,,,,,,,,,,,,,,,,,,,,,,,,,,,,,,,,,,,
27,2.5,7,1994,0.1,9,1994,0,12,1994,0,9,1995,0,3,1995,0,3,1996,0.1,9,1996,0,11,1996,0,10,1997,0.1,10,1998,0.2,4,1999,0.3,11,1999,0.6,9,2002,0.7,4,2003,,,,,,,,,,,,,,,,,,,,,,,,
28,3.8,3,1993,0,4,1993,0,9,1993,0,1,1994,0,7,1994,0,12,1994,0,7,1995,0,3,1996,0,9,1996,0,3,1997,0.1,9,1997,0,3,1998,0,9,1998,0,3,1999,0,9,1999,0,3,2000,0,3,2001,0,2,2002,,,,,,,,,,,,
29,3.1,3,1993,0.1,5,1993,0,8,1993,0,11,1993,0,2,1994,,,,,,,,,,,,,,,,,,,,,,,,,,,,,,,,,,,,,,,,,,,,,,,,,,,
30,53,3,1993,0.4,6,1993,0,9,1993,0,11,1993,0,2,1994,0,4,1996,0,9,1997,0,5,1998,0,11,1998,0,5,1999,0,11,1999,0,5,2000,0,11,2000,0,8,2001,0,1,2002,0,7,2002,0,1,2003,,,,,,,,,,,,,,,
